# Supplementary material
Source: PubMed Central journal article supplement (PMC4487246)
Supplement: Supp_Figure1.pdf [file Supp_Figure1.pdf]

## Supplementary Data

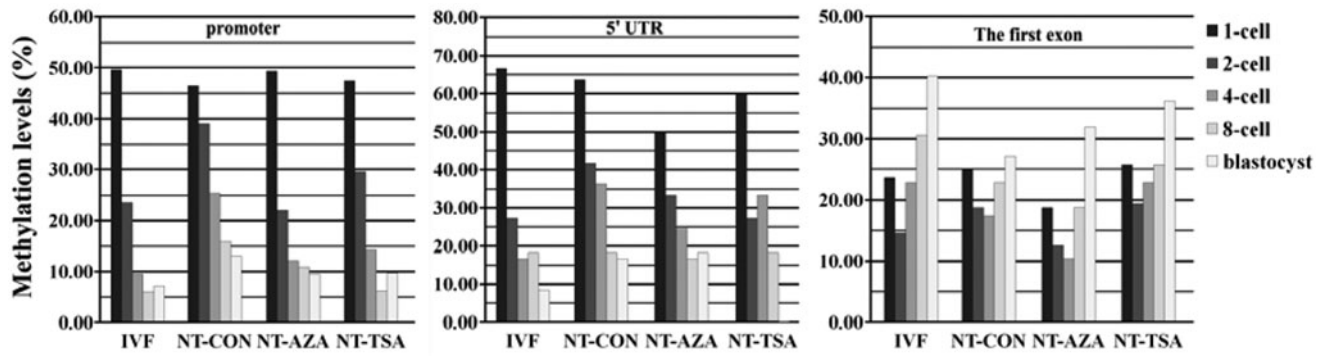

**SUPPLEMENTARY FIG. S1.** Dynamic methylation profiles of the *Nanog* promoter, 5'-UTR, and first exon in the IVF, NT-CON, NT-AZA, and NT-TSA groups, respectively.
