# Supplementary material
Source: PubMed Central journal article supplement (PMC4487246)
Supplement: Supp_Figure3.pdf [file Supp_Figure3.pdf]

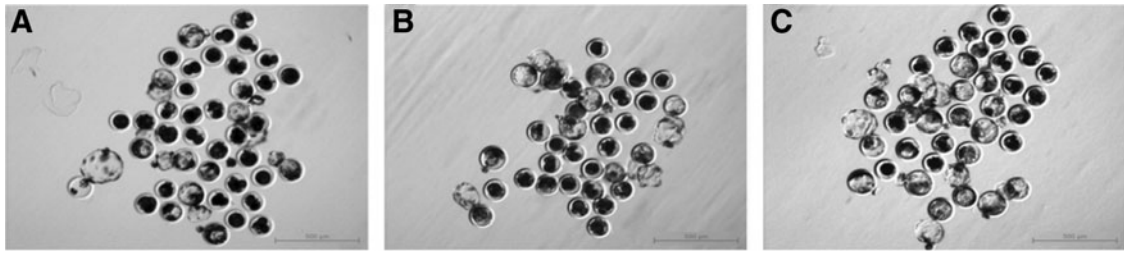

**SUPPLEMENTARY FIG. S3.** Blastocysts derived from cloned embryos that were untreated (A), treated with 5-aza-dC (B), or treated with TSA (C).
