# Supplementary material
Source: PubMed Central journal article supplement (PMC4487246)
Supplement: Supp_Table1.pdf [file Supp_Table1.pdf]

SUPPLEMENTARY TABLE S1. DETAIL OF PRIMERS FOR BISULFITE SEQUENCING AND REAL-TIME QUANTITATIVE PCR

| <i>Gene</i>                        | <i>Primer sequence (5' → 3')</i>                                                | <i>Length (bp)</i> | <i>Accession no.</i> |
|------------------------------------|---------------------------------------------------------------------------------|--------------------|----------------------|
| Bisulfite sequencing               |                                                                                 |                    |                      |
| <i>Nanog</i> (promoter and 5'-UTR) | Outer<br>F, TGAATTGGAGATTTAAAGGAG<br>R, TAAAATCATAAAAATCTCCTCC                  | 518                | EF_522119            |
|                                    | Inner<br>F, GGAGATTTAAAGGAGTTTTAGGTTAAGAAA<br>R, TCTCCTCCAAATATTA AAAATATCAAAAA | 498                |                      |
| <i>Nanog</i> (the first exon)      | Outer<br>F, TAATATTTGGAGGAGATTTTTATGA<br>R, AAACAAC TTA ACTTTTCAATTTTTC         | 325                | EF_522119            |
|                                    | Inner<br>F, TGAGTGTGGATTTAGTTTGTTTTTAAA<br>R, ATCAAAATTCAA AATTTTCTTACCAAT      | 173                |                      |
| Real-time quantitative PCR         |                                                                                 |                    |                      |
| <i>Oct4</i>                        | F, GAAGGTGTTTCAGCCAAACGAC<br>R, CGATACTTGTCCGCTTTC                              | 185                | NM_001113060         |
| <i>Nanog</i>                       | F, CCTCCATGGATCTGCTTATTC<br>R, CATCTGCTGGAGGCTGAGGT                             | 209                | NM_001129971         |
| <i>Sox2</i>                        | F, AACCAGAAGAACAGCCCAGAC<br>R, TCCGACAAAAGTTTCCACTCG                            | 155                | NM_001123197         |
| <i>18S</i>                         | F, AATCTCGGGTGGCTGAACGC<br>R, CCGTTCTAGTTGGTGGAGCGAT                            | 143                | NR_002170            |

F, forward; R, reverse.
