# Supplementary material
Source: PubMed Central journal article supplement (PMC4487246)
Supplement: Supp_Table2.pdf [file Supp_Table2.pdf]

SUPPLEMENTARY TABLE S2. *IN VITRO* DEVELOPMENT OF PORCINE CLONED EMBRYOS

| <i>Groups</i> | <i>No. embryos (Rep.)</i> | <i>No. embryos cleaved<br/>(% ± SEM)</i> | <i>No. blastocysts<br/>(% ± SEM)</i> |
|---------------|---------------------------|------------------------------------------|--------------------------------------|
| NT-CON        | 242 (5)                   | 209 (85.79 ± 0.95) <sup>a</sup>          | 50 (20.50 ± 0.70) <sup>a</sup>       |
| NT-AZA        | 247 (5)                   | 223 (89.88 ± 1.14) <sup>b</sup>          | 67 (27.30 ± 1.24) <sup>b</sup>       |
| NT-TSA        | 238 (5)                   | 210 (88.82 ± 1.12) <sup>ab</sup>         | 118 (50.71 ± 2.21) <sup>c</sup>      |

<sup>a-c</sup>Values in the same column with different superscripts differ significantly ( $p < 0.05$ ).

SEM, standard error of the mean; NT-CON, control group; NT-AZA, 5-aza-2'-deoxycytidine (5-aza-dC) group; NT-TSA, trichostatin A group.
